# Supplementary material
Source: Springer Nature journal article supplement (https://www.springermedizin.de/resource/supplementary/12882_2012_547_MOESM2_ESM.pdf/9454288)
Supplement: MOESM2 [file 9454288]

1. Thirst is a problem for me<sup>[23]</sup>

- 1  never/ almost never
- 2  occasionally
- 3  often

2. I'm thirsty during the day<sup>[24]</sup>

- 1  never/ almost never
- 2  occasionally
- 3  often

3. I'm thirsty during the night<sup>[25]</sup>

- 1  never/ almost never
- 2  occasionally
- 3  often

4. My social life is influenced by my thirst<sup>[26]</sup>

- 1  never/ almost never
- 2  occasionally
- 3  often

5. I'm thirsty before dialytic session<sup>[27]</sup>

- 1  never/ almost never
- 2  occasionally
- 3  often

6. I'm thirsty during dialytic session<sup>[28]</sup>

- 1  never/ almost never
- 2  occasionally
- 3  often

7. I'm thirsty after dialytic session<sup>[29]</sup>

- 1  never/ almost never
- 2  occasionally
- 3  often
